# Supplementary material for: Largely-increased length of silver nanowires by controlled oxidative etching processes in solvothermal reaction and the application in highly transparent and conductive networks
Source: Royal Society of Chemistry journal article supplement (doi:10.1039/c6ra20147d), 2016-01-01
Supplement: c6ra20147d1.pdf [file c6ra20147d1.pdf]

## Supporting information

### **Largely-increased length of silver nanowires by controlled oxidative etching process in solvothermal reaction and the application in highly transparent and conductive networks**

Xiaomei Xu, Song He, Conghua Zhou\*, Xingda Xia, Liao Xu, Hui Chen, Bingchu

Yang, Junliang Yang

Hunan Key Laboratory of Super Microstructure and Ultrafast Process, School of Physics and Electronics, Central South University, Changsha, Hunan 410083, P. R. China

\*Correspondence should be addressed to: [chzhou@csu.edu.cn](mailto:chzhou@csu.edu.cn) (C.H. Zhou)

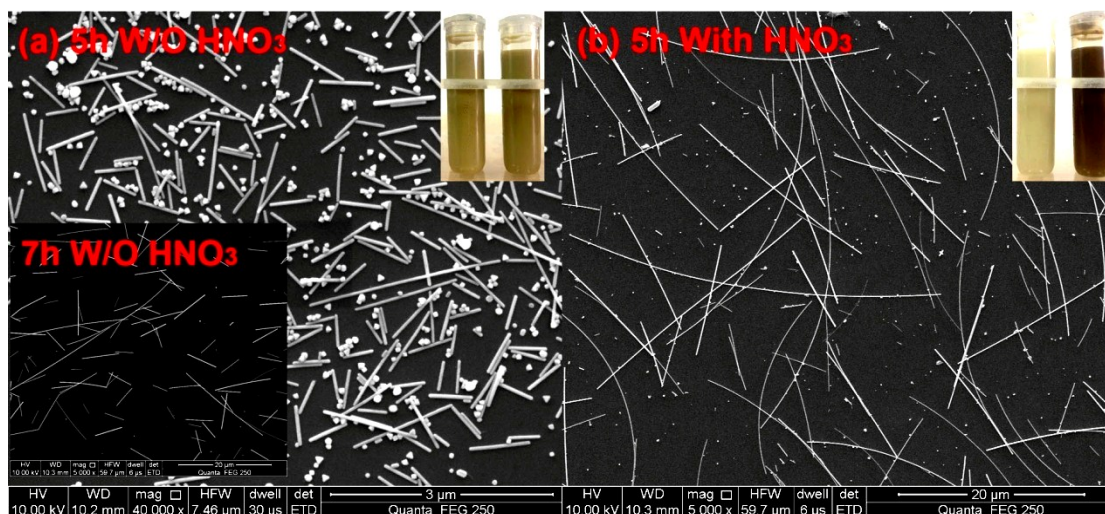

**Figure S1.** SEM images of AgNWs synthesized by solvothermal reaction: (a) W/O pre-added HNO<sub>3</sub> and reacted at 135°C for of 5h (inset shows 7h reaction W/O HNO<sub>3</sub> pre-added). (b) With pre-added HNO<sub>3</sub> (0.5mL, 0.22mol/L) and reacted at 135°C for of 5h. Photo images in right corner of each figure were: (left) peaked after reaction and (right) mixed with equivalent volume NaOH solution (0.25mol/L).

Photo images at right upper corners depicts indicative experiment to show whether Ag<sup>+</sup> exists in solution. This was done by adding NaOH solution into the as-reacted solution with equivalent volume. Color change was due to reaction between Ag<sup>+</sup> and OH<sup>-</sup>, as described by:

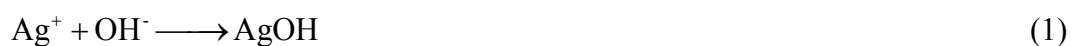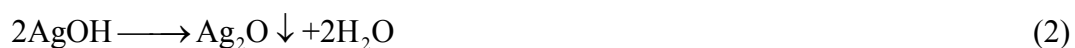

For sample fetched from reaction W/O addition of  $\text{HNO}_3$ , the color changed little, thus almost all the  $\text{Ag}^+$  ions had been reduced. While for that with  $\text{HNO}_3$  pre-added, the color changed from grey white to dark brown, implying that there were concentrated  $\text{Ag}^+$  ions left in the solution. This also means, reduction rate of  $\text{Ag}^+$  ions was lowered due to pre-added  $\text{HNO}_3$ , which coincides with the Le Chatelier's principle. And the corresponding SEM morphological properties of AgNWs obtained with or W/O  $\text{HNO}_3$  pre-added, AgNWs synthesized at  $135^\circ\text{C}$  for 5h showed length less than  $3\mu\text{m}$  (Figure S1 a), while that with  $\text{HNO}_3$  (0.5mL, 0.22mol/L) added showed length up to  $\sim 50\mu\text{m}$  (Figure S1 b). Although increasing the reacting period to 7h could make increment of length to  $\sim 30\mu\text{m}$  in the case of W/O  $\text{HNO}_3$  pre-added, it was yet far shorter than that synthesized with  $\text{HNO}_3$  added (up to  $460\mu\text{m}$  according to Figure 1).

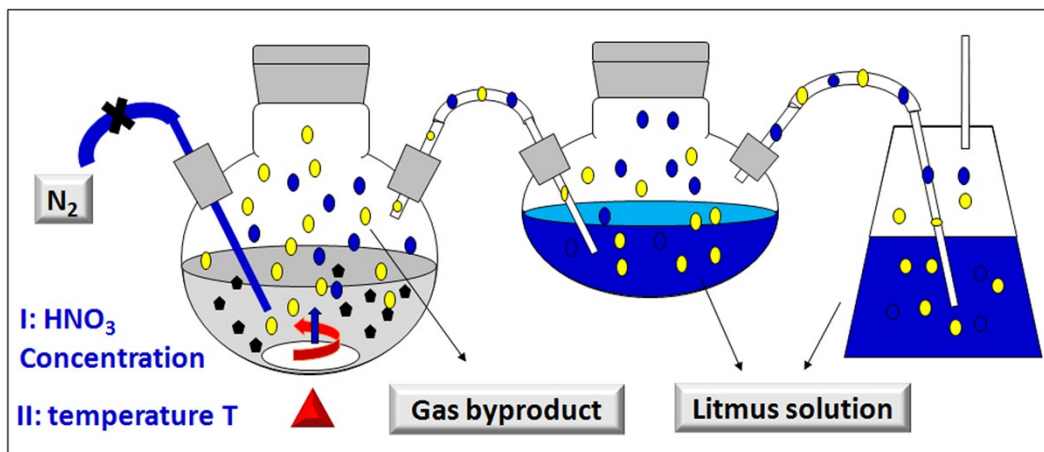

**Figure S2.** Schematic of indicative experiment. Gas byproduct of the reaction is guided to litmus solution, of which the color could change from blue to red when meeting with acidic substance. Color of litmus solution is monitored in four cases as mixed orthogonally between 1)  $\text{HNO}_3$  concentration ( $\text{N}_2$  is guided or not to provide low/high concentration ) and 2) temperature  $T$  ( $125^\circ\text{C}$  and  $170^\circ\text{C}$ ). Before reactions take place, air is expelled by  $\text{N}_2$  (99.99% in purity) for 20min. All the material (and hence the concentration) used in the reaction is same to that described in the experimental section, except for that no additional  $\text{HNO}_3$  is added here.

**Table SI** Color evolvement of litmus solution in the four indicative experiments

| Order | Description                            | litmus solution color change with time(min) |    |        |    |    |    |        |                           |     |     |
|-------|----------------------------------------|---------------------------------------------|----|--------|----|----|----|--------|---------------------------|-----|-----|
|       |                                        | 0                                           | 20 | 30     | 50 | 70 | 90 | 110    | 120                       | 130 | 140 |
| No. 1 | $170^\circ\text{C}$ &High <sup>a</sup> | Blue                                        |    |        |    |    |    |        | Air imported <sup>c</sup> |     |     |
| No. 2 | $170^\circ\text{C}$ &Low <sup>b</sup>  |                                             |    |        |    |    |    |        |                           |     |     |
| No. 3 | $125^\circ\text{C}$ &High <sup>a</sup> | Blue                                        |    |        |    |    |    |        |                           | Red |     |
| No. 4 | $125^\circ\text{C}$ &Low <sup>b</sup>  | Blue                                        |    | Purple |    |    |    | Orange |                           | Red |     |

<sup>a</sup>  $\text{N}_2$  was not conducted, thus  $\text{HNO}_3$  accumulates in the container, thus hence provides

background with relative higher concentration.

<sup>b</sup> HNO<sub>3</sub> was guided out by N<sub>2</sub>, thus relative low concentration was provided.

<sup>c</sup> Air was imported only in case of No.1 experiment, in all other three experiments, no air was imported, thus the color changes shows HNO<sub>3</sub> was produced.

Figure S2 depicts the “indicative experiment” used to judge the role of HNO<sub>3</sub> in the low temperature reaction. Litmus solution was used to judge nature of gas byproduct of reaction. That is, if acidic gas was obtained, like HNO<sub>3</sub> or NO<sub>2</sub>, the litmus solution should change from its original blue color to the red. Otherwise, it will remain unchanged. Orthogonal experiments were designated with respect to temperature & HNO<sub>3</sub> concentration: for temperature, 170°C and 125°C were chosen; while for concentration, N<sub>2</sub> bubbles (expel the byproduct gas) were used or not so as to provide lower or higher HNO<sub>3</sub> concentrations. Before reactions, air was expelled by N<sub>2</sub> bubbles (purity of 99.99%) for 20min. All experiments were monitored and recorded by a digital video camera, of which the color evolvement with time was collected in Table SI. It could be found that, when it was reacted at 170°C & W/O N<sub>2</sub> bubbles (No. 1), color of litmus solution remained blue (original color) during the whole reaction; But after air was introduced by fan, it changed quickly to red, indicating that NO had been mainly produced. Such NO could then react with O<sub>2</sub> and led to NO<sub>2</sub>. The NO<sub>2</sub> could then reacted with H<sub>2</sub>O and obtain HNO<sub>3</sub>, which changed litmus color from blue to red. In all other three cases, litmus solution changed gradually from blue to red, showing HNO<sub>3</sub> was produced in major. The indicative

experiments thus clearly showed that during the reaction,  $\text{HNO}_3$  presented oxidative nature mainly in both higher temperature and higher concentration. Then in the solvothermal reaction used here, oxidative  $\text{HNO}_3$  should not conduct in the reaction since the temperature was as low as 125 °C.

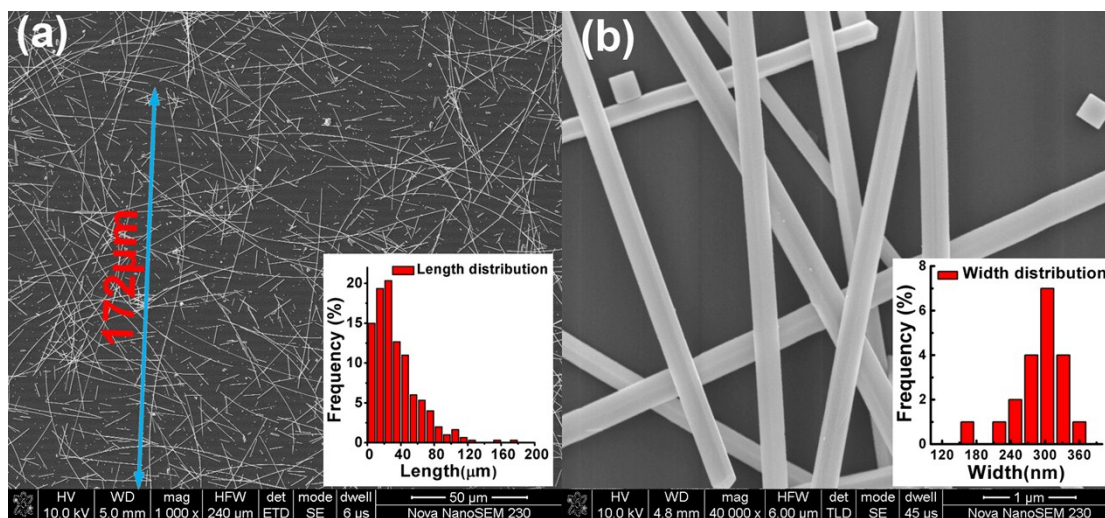

**Figure S3. Typical SEM images of AgNWs synthesized by 1-step polyol method 125 °C and corresponding statistics on both nanowire length (a) and width (b).**

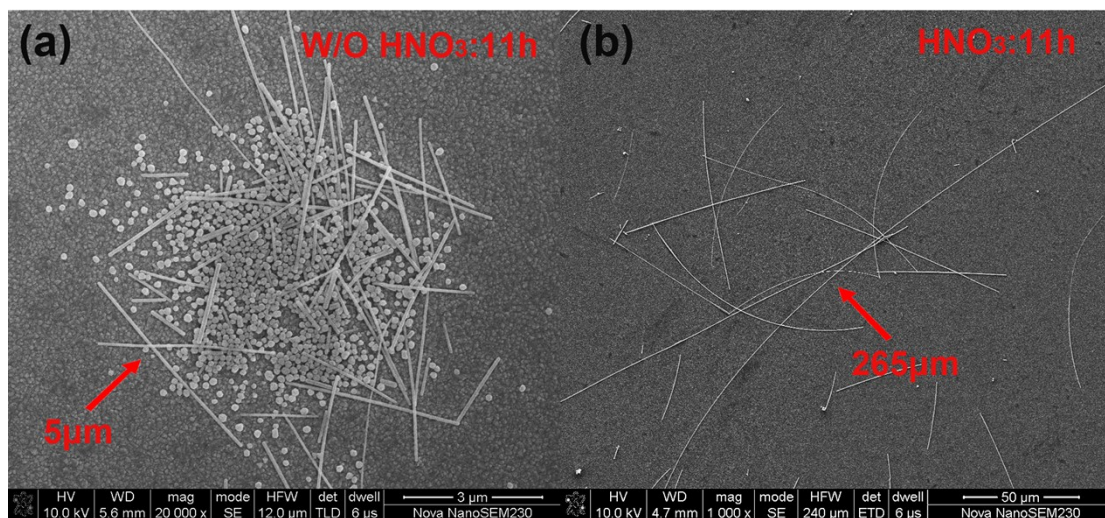

Figure S4. Typical SEM images of AgNWs synthesized by solvothermal reaction at 125 °C: (a) 11h & W/O HNO<sub>3</sub> pre-added, (b) 11h & with HNO<sub>3</sub> pre-added (0.5 mL, 0.22 mol/L).

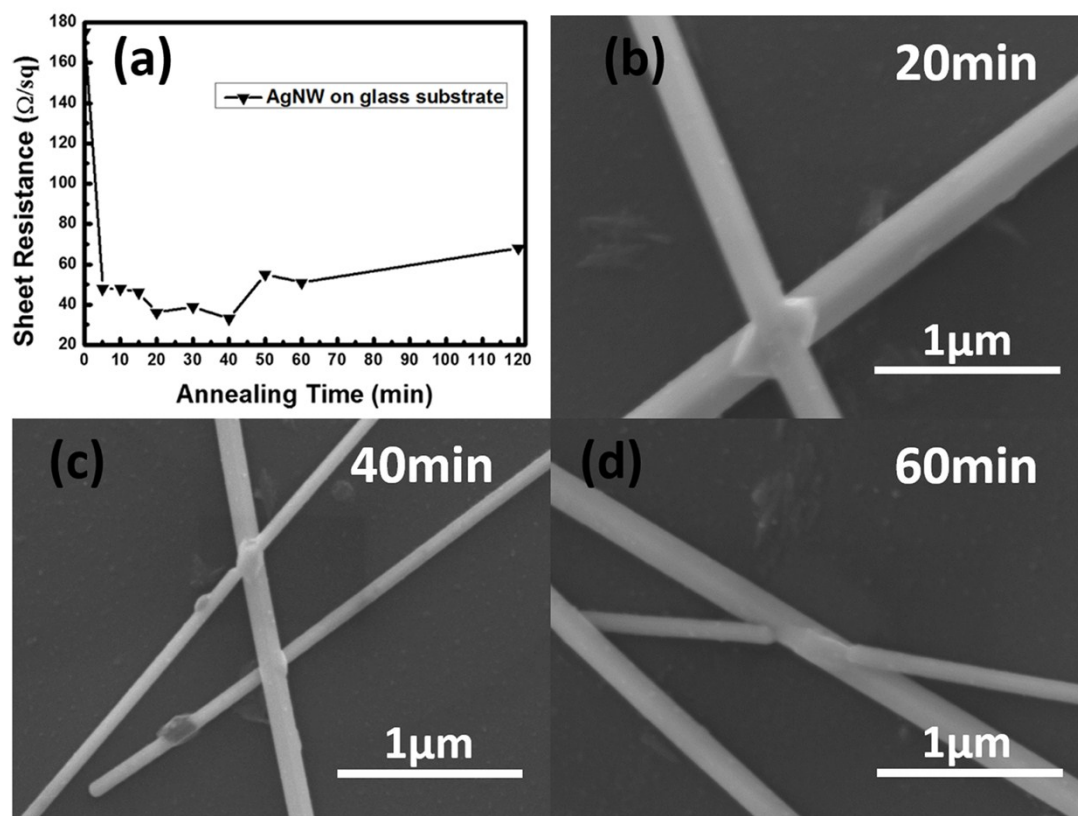

Figure S5. (a) Effect of annealing time on Sheet resistance of AgNWs TCFs on glass substrate (temperature was 200°C). SEM images of contact point between AgNWs annealed at different period: (b) 20 min, (c) 40 min, (d) 60 min.
